# Supplementary material
Source: Springer Nature journal article supplement (https://www.springermedizin.de/resource/supplementary/12936_2013_2948_MOESM1_ESM.pdf/9544560)

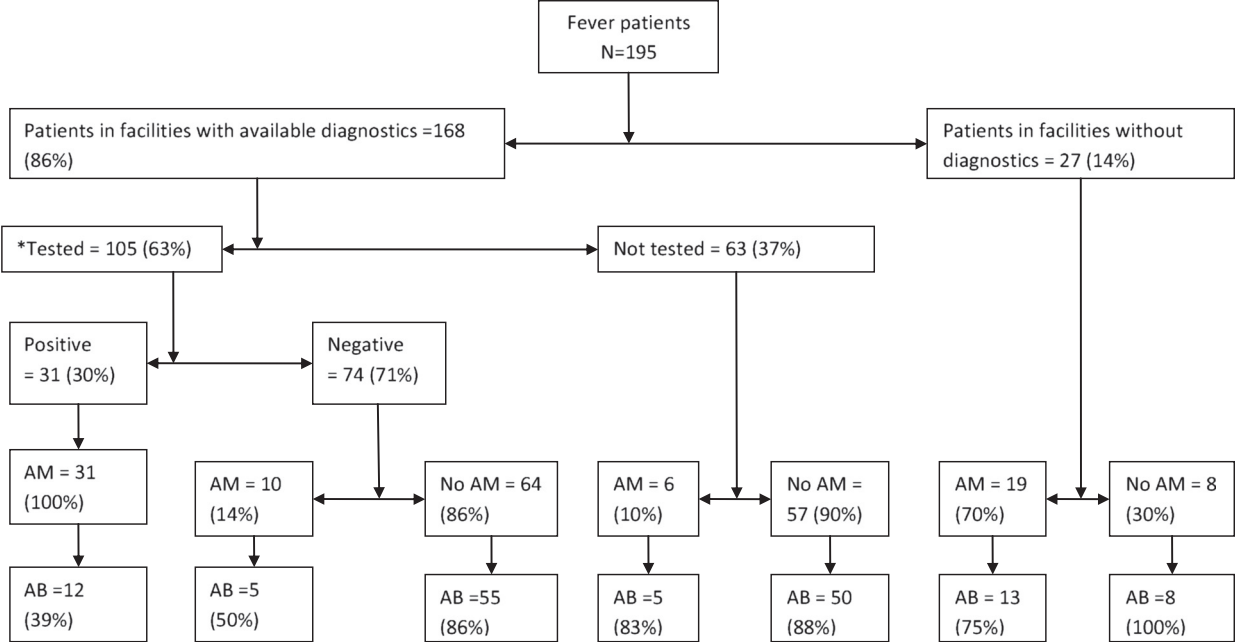

\*Tested includes both RDT and microscopy, AM =Anti-malarial drugs, AB=Antibiotics

Supplement: MOESM1 [file 9544560]
